# Supplementary material for: Comparison of primary and secondary particle formation from natural gas engine exhaust and of their volatility characteristics
Source: Copernicus journal article supplement (doi:10.5194/acp-17-8739-2017), 2017-07-18
Supplement: Supplementary file 1 [file acp-17-8739-2017-supplement.pdf]

Supplement of Atmos. Chem. Phys., 17, 8739–8755, 2017  
<https://doi.org/10.5194/acp-17-8739-2017-supplement>  
© Author(s) 2017. This work is distributed under  
the Creative Commons Attribution 3.0 License.

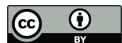

*Supplement of*

## **Comparison of primary and secondary particle formation from natural gas engine exhaust and of their volatility characteristics**

**Jenni Alanen et al.**

*Correspondence to:* Topi Rönkkö (topi.ronkko@tut.fi)

The copyright of individual parts of the supplement might differ from the CC BY 3.0 License.

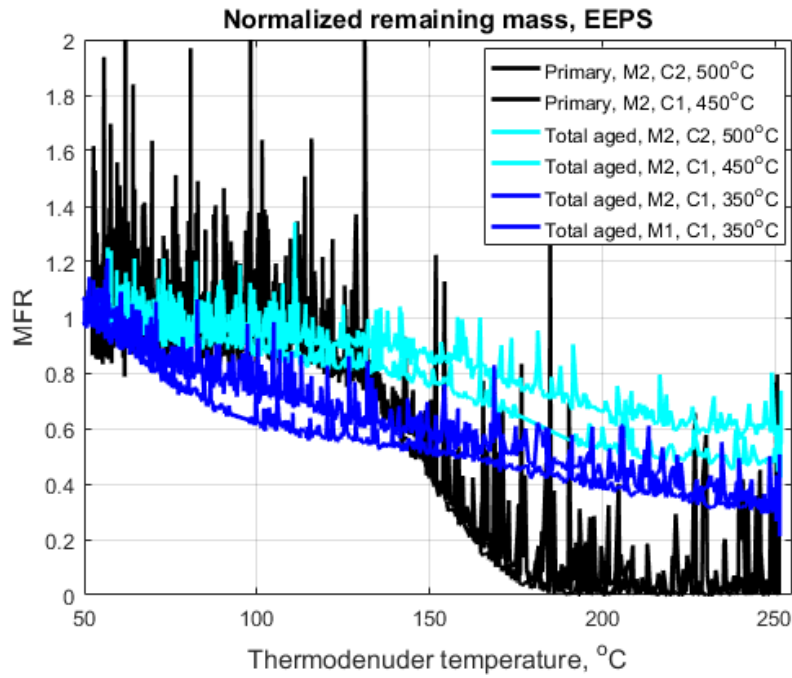

*S1 Original one-second-resolution results of particle volatility measurements. Particle mass fraction remaining (MFR) after the thermodenuder treatment for the exhaust aerosol sample of three different types of particle emission from the natural gas engine. MFR values were calculated from the size distributions measured by EEPS with unit mass assumption.*

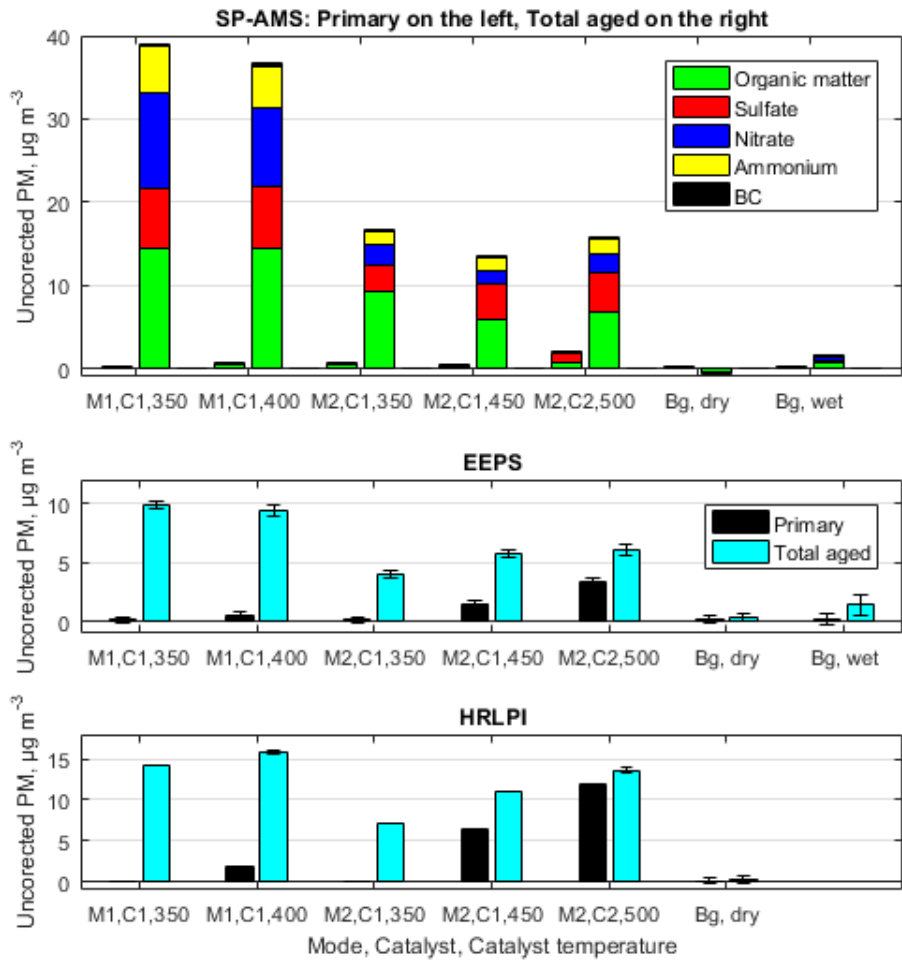

*S2 Exhaust primary and total aged particle mass concentrations, compared with blank measurements, measured by SP-AMS, EEPS and HRLPI at different engine modes and catalyst temperatures.*

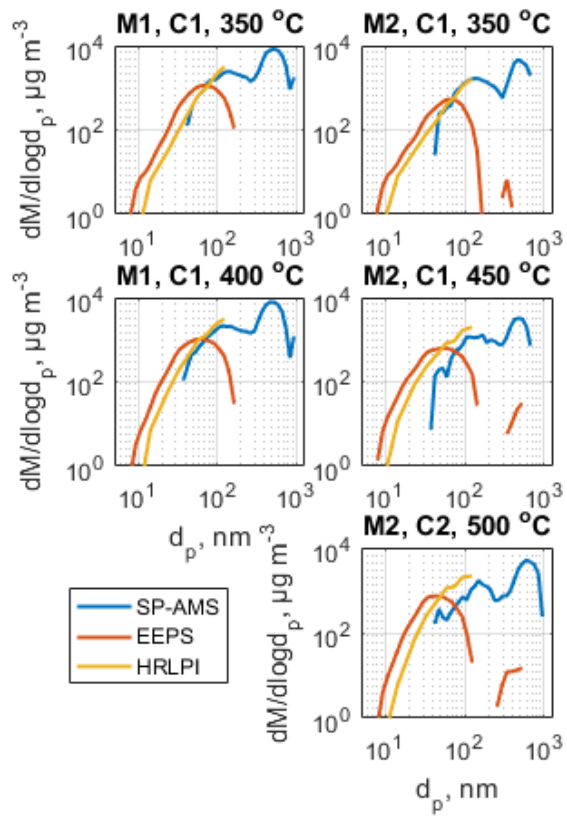

S3 Particle mass size distributions measured with SP-AMS, HRLPI and EEPS. Note that  $d_p$  stands for aerodynamic diameter for HRLPI, vacuum aerodynamic diameter for SP-AMS and mobility diameter for EEPS.
